# Supplementary material for: Age-Dependent Hemoglobin A1c Therapeutic Targets Reduce Diabetic Medication Changes in the Elderly
Source: PubMed Central journal article supplement (PMC6715934; doi:10.5334/egems.303), 2019-08-26
Supplement: egems-7-1-303-s1.pdf [file egems-7-1-303-s1.pdf]

## Appendix 1. HbA1c result counts by age group and HbA1c range.

| HbA1c (%) | Age Group |         |           | Total   |
|-----------|-----------|---------|-----------|---------|
|           | 55 - 64   | 65 - 75 | 76 and up |         |
| < 7.0     | 125,512   | 154,084 | 93,479    | 373,075 |
| 7.0 - 7.5 | 51,865    | 54,346  | 25,401    | 131,612 |
| 7.5 - 8.0 | 31,988    | 35,620  | 15,696    | 83,304  |
| ≥ 8.0     | 57,252    | 46,974  | 19,183    | 123,409 |
| Total     | 266,617   | 291,024 | 153,759   | 711,400 |
