# Supplementary material for: Age-Dependent Hemoglobin A1c Therapeutic Targets Reduce Diabetic Medication Changes in the Elderly
Source: PubMed Central journal article supplement (PMC6715934; doi:10.5334/egems.303), 2019-08-26

## Appendix 2. Fraction of HbA1c results with an order in the following 6 weeks, by age group.

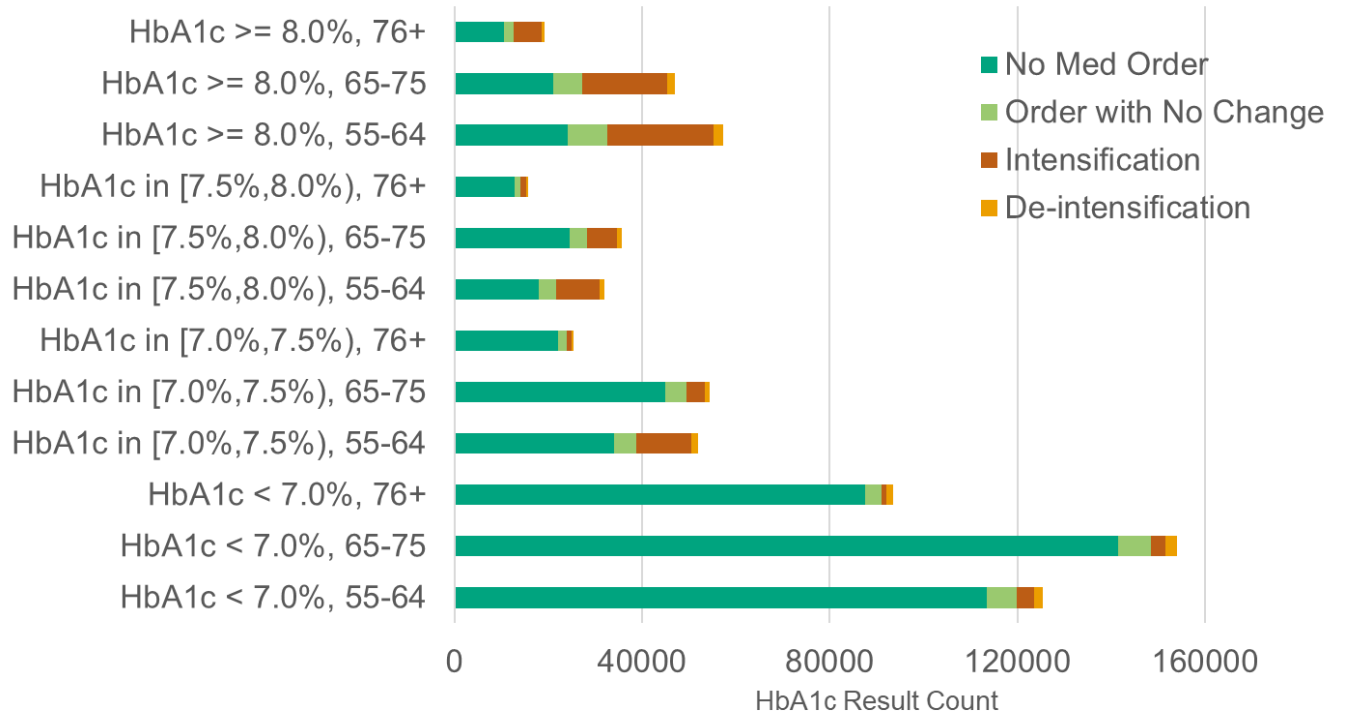

Supplement: egems-7-1-303-s2.pdf [file egems-7-1-303-s2.pdf]
